# Supplementary material for: Wnt1 silences chemokine genes in dendritic cells and induces adaptive immune resistance in lung adenocarcinoma
Source: PubMed Central journal article supplement (PMC6441097; doi:10.1038/s41467-019-09370-z), 2019-03-29
Supplement: 41467_2019_9370_MOESM1_ESM.pdf [file 41467_2019_9370_MOESM1_ESM.pdf]

Wnt1 silences chemokine genes in dendritic cells and induces adaptive immune resistance in lung adenocarcinoma

Kerdidani et al.

**Supplementary Figure 1**

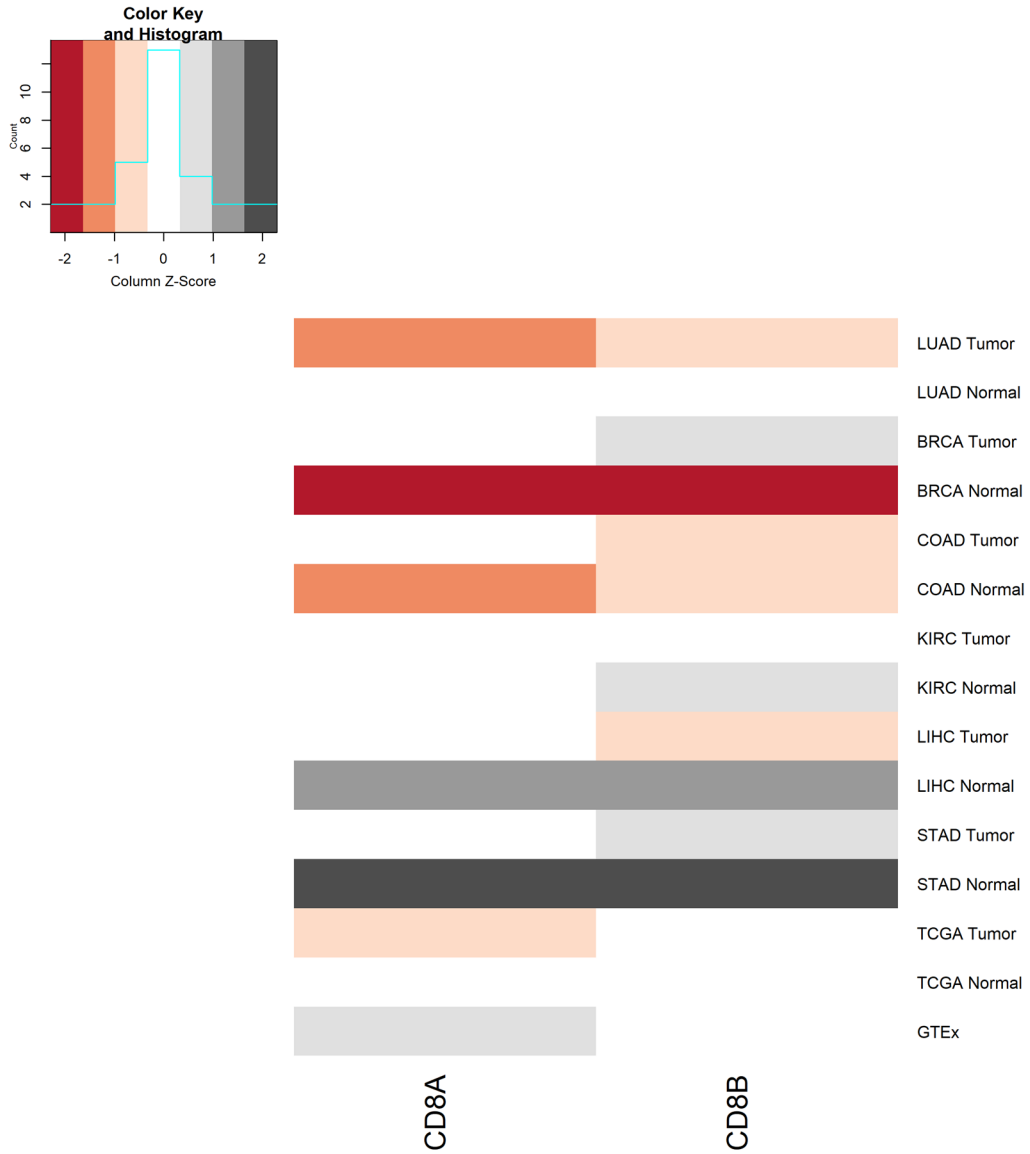

**Figure S1. Heatmaps of Wnt1-CD8a, Wnt1-CD8b correlation z-scores in TCGA.** Datasets from RNA sequencing analysis of paired tumor and normal tissues were analyzed for WNT1 and CD8a, CD8b. Correlation z-scores shown in heatmap. Genotype-Tissue Expression (GTEEx) datasets were used as control. Column side annotations are gene names and row side annotations are cancer names. LUAD: Lung adenocarcinoma, BRCA: Breast Carcinoma, COAD: Colon Adenocarcinoma, KIRC: Kidney Renal Clear Cell Carcinoma, STAD: Stomach Adenocarcinoma, LIHC: Liver Hepatocellular Carcinoma.

Supplementary Figure 2

A

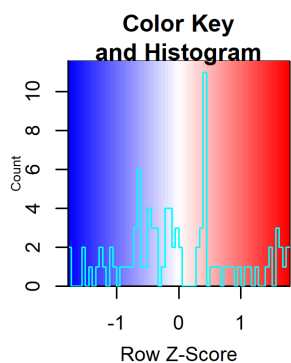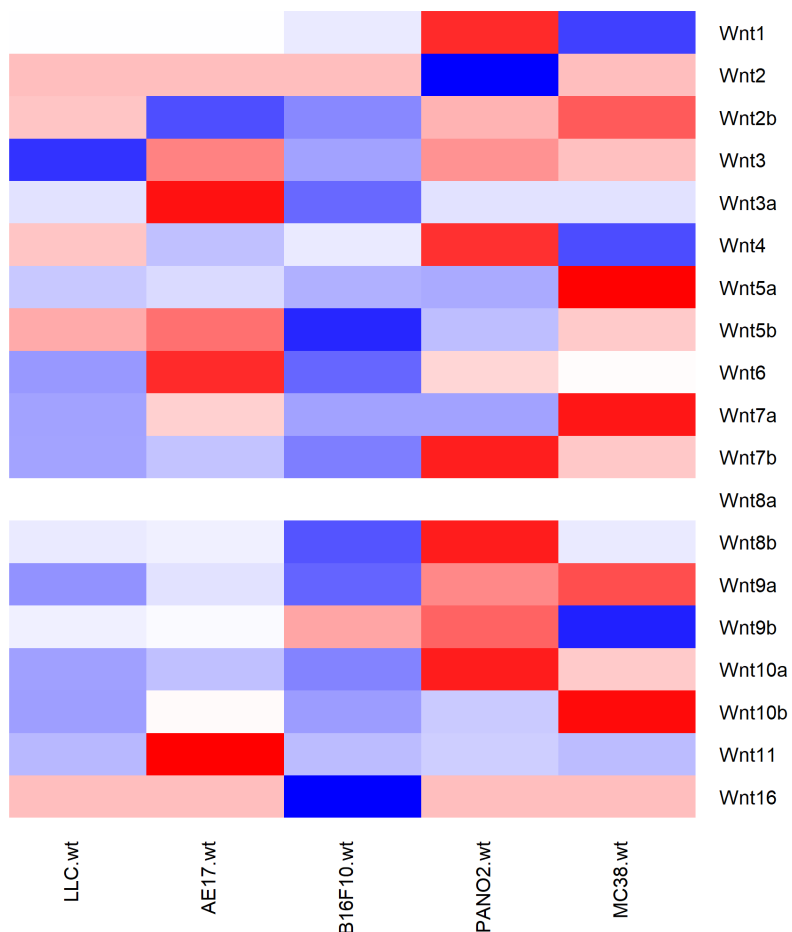

B

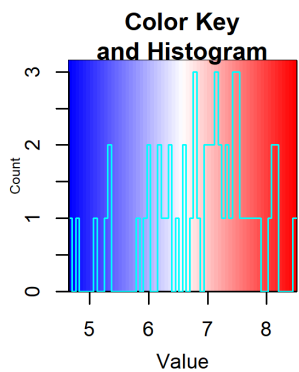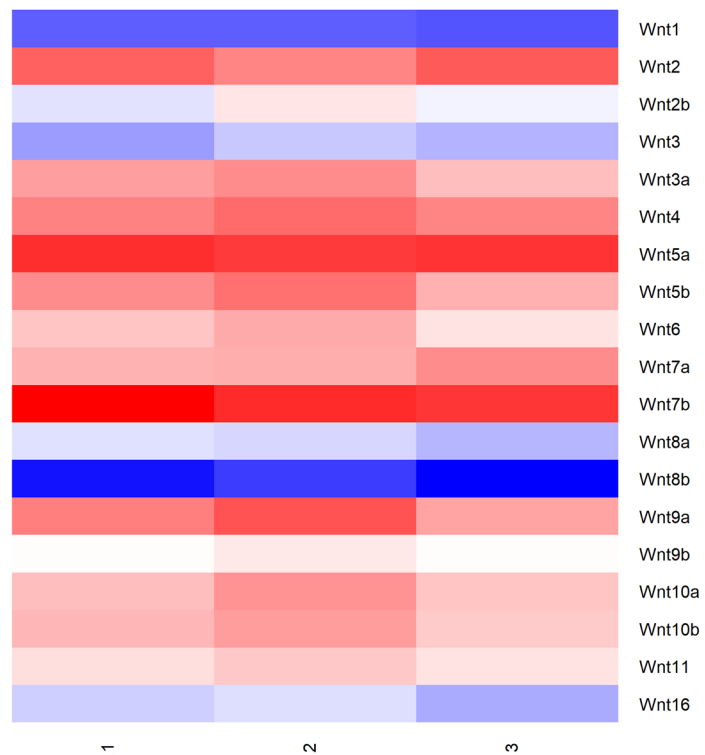

**Figure S2. Microarray heatmaps of Wnt ligand expression by LLC cells in vitro and in vivo.** Analysis of gene expression profiles was performed on microarray datasets from GSE. **A**, Microarray heatmap of Wnts expressed by several murine cancer cell lines, including LLC cells (GSE58188). Column side annotations are names of murine cancer cell lines and row side annotations are names of Wnt ligands. **B**, Microarray heatmap of Wnts expressed by LLC lung tumors (n=3 biological replicates) (GSE36568). Column side annotations are serial numbers of individual mice and row side annotations are names of Wnt ligands.

**Supplementary Figure 3**

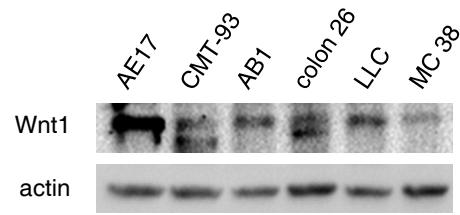

**Figure S3. Comparative immunoblot analysis of Wnt1 in several murine cancer cell lines.** The analysis was performed using anti-WNT1 antibody. B-actin was used as loading control. Source data are provided as a Source Data file.

## Supplementary Figure 4

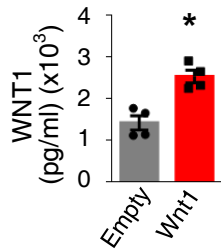

**Figure S4. Extracellular Wnt1 (ELISA) in LLC lung tumors.** Wnt1 overexpressing versus control (Empty) LLC lung tumors were resected, cut into small pieces and cultured for 16 hours. Wnt1 protein was quantified in culture supernatants by ELISA. Error bars represent mean with SEM. Data are representative of two independent experiments with 4 mice per group. \*p < 0.05, with Mann Whitney U. Source data are provided as a Source Data file.

Supplementary Figure 5

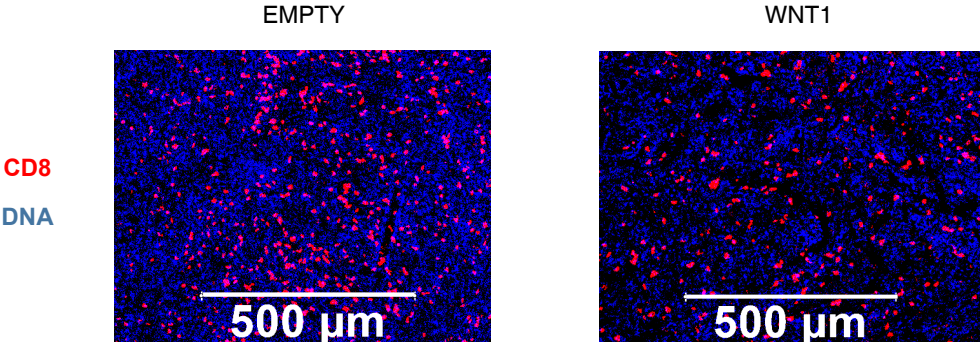

**Figure S5. Confocal images of immunofluorescence staining for CD8 on lung LLC tumors.** Representative images of CD8 stained lung tumor sections from Wnt1-overexpressing LLC (Wnt1) versus control (Empty) tumors.

## Supplementary Figure 6

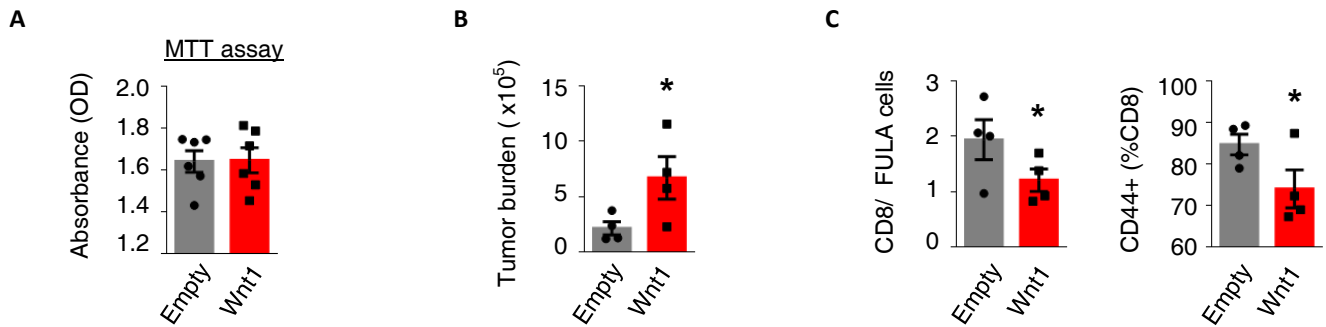

**Figure S6. Growth of a Wnt1-overexpressing autochthonous lung adenocarcinoma cell line.** The FULA (FVB Urethane-induced Lung Adenocarcinoma) cell line, derived from autochthonous urethane-induced lung tumor, was transduced with Wnt1 (Wnt1) or Empty (Empty) viral vectors. A, In vitro proliferation (MTT assay). B, Tumor burden (total absolute number of Fula cells) 14 days after intrapulmonary implantation in syngeneic FVB mice. C, Numbers of intratumoral CD8<sup>+</sup> T cells per cancer cell and T cell CD44 expression. Error bars represent mean with SEM. Data are representative of two independent experiments with 4-5 mice per group. \*p < 0.05 with t-test. Source data are provided as a Source Data file.

Supplementary Figure 7

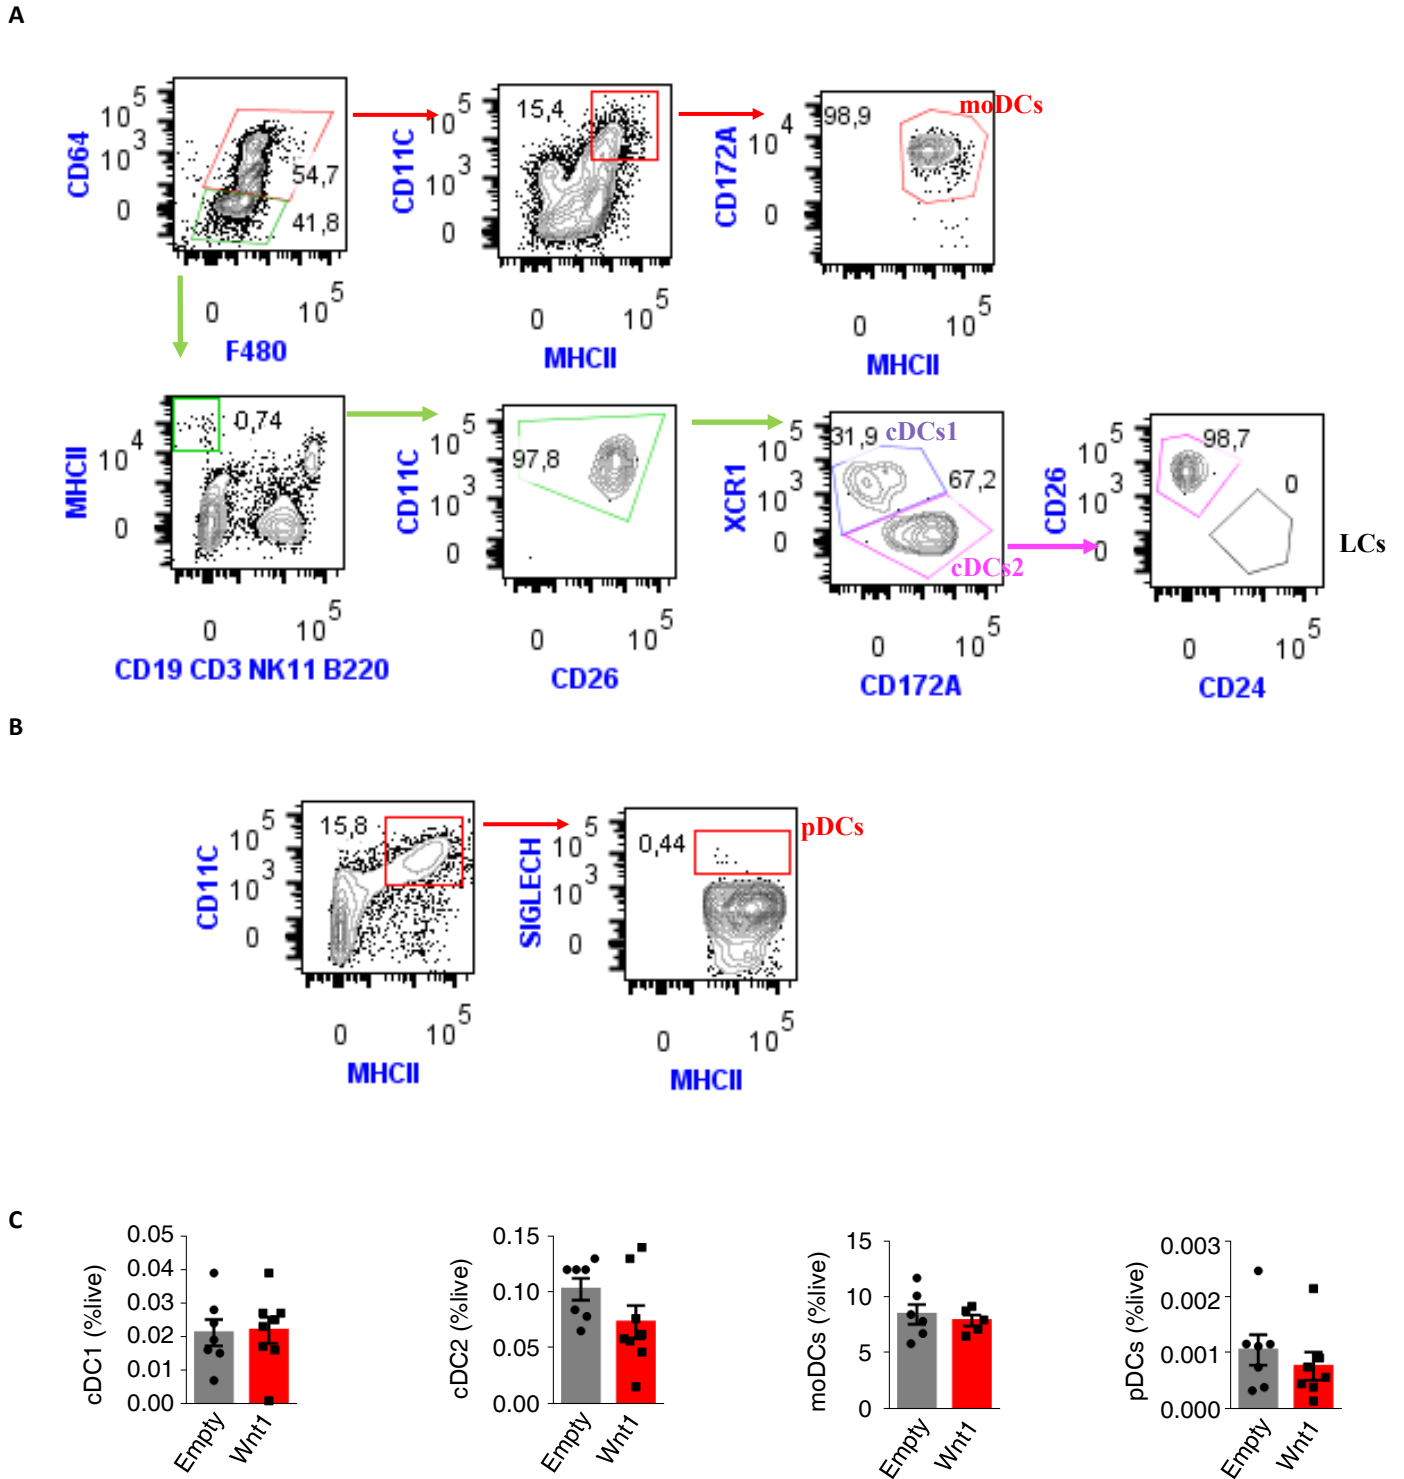

**Figure S7. Gating strategy for FACS analysis of tumor infiltrating DC subsets and moDCs .** WNT1-overexpressing and control (Empty) LLC cells were implanted intrapulmonary. On day 14 lung tumors were excised and dispersed. **A**, Gating of intratumoral cDCs and moDCs (Guilliams et al., 2016, Immunity 45, 1–16). cDCs 1 were gated as XCR1<sup>+</sup> cells, while cDCs2 as CD172a<sup>+</sup> cells among CD64<sup>+</sup>MHCII<sup>+</sup>CD3<sup>+</sup>CD19<sup>-</sup>B220<sup>-</sup>NK1.1<sup>-</sup>CD11c<sup>+</sup>CD26<sup>+</sup> cells. CD26<sup>-</sup>CD24<sup>+</sup> Langerhans cells (LCs) were not identified in any LLC tumor. moDCs were gated as CD11c<sup>+</sup>MHCII<sup>+</sup>CD172<sup>+</sup> cells among CD64<sup>+</sup> F4/80<sup>+</sup> cells. **B**, Gating of intratumoral pDCs. pDCs were gated as SIGLECH<sup>+</sup> cells among CD11c<sup>+</sup>MHCII<sup>+</sup> cells. **C**, Percentages of DC subsets among total live cells. Error bars represent mean with SEM. Data are representative of two independent experiments with 6-8 mice per group. Source data are provided as a Source Data file.



## Supplementary Figure 8

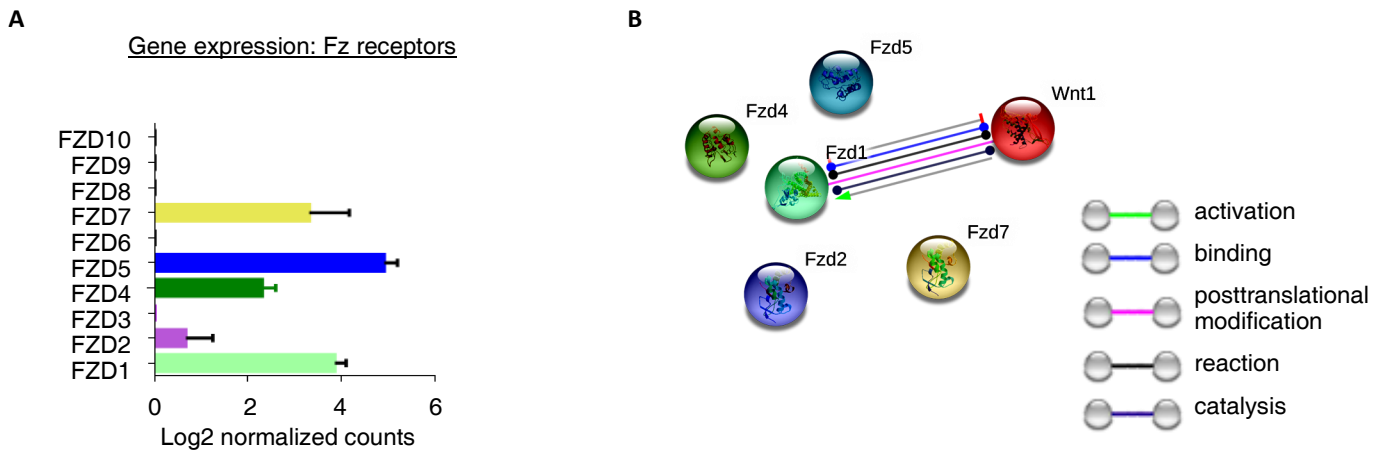

**Figure S8. Frizzled receptor expression by intratumoral cDCs.** **A**, Barplot of raw expression values ( $\log_2$  read counts) of Frizzled receptors in cDCs FACS sorted from lung LLC tumors. Mean $\pm$ SEM are shown. **B**, Network of Wnt1 and Frizzled receptors, inferred from String database (network indicates experiments with high confidence interaction score (0.700)).

## Supplementary Figure 9

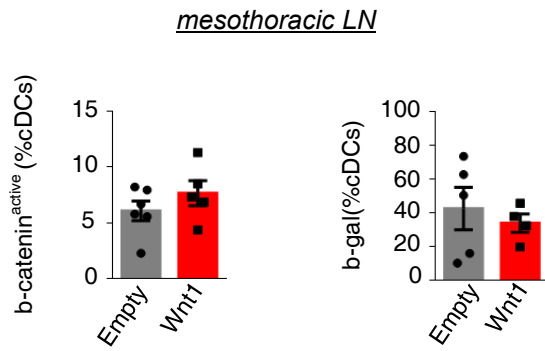

**Figure S9. Wnt/b-catenin pathway activation in tumor draining lymph nodes.** Wnt1-overexpressing LLC versus control (Empty) cells were implanted intrapulmonary in WNT pathway reporter mice (*Axin2<sup>LacZ</sup>*). On day 14 mesothoracic lymph nodes were excised and dispersed. Active b-catenin and b-galactosidase expression among nodal cDCs were quantified by FACS. Mean  $\pm$  SEM are shown. Data are representative of 2 independent experiments (n=4-6 mice per group). Source data are provided as a Source Data file.

## Supplementary Figure 10

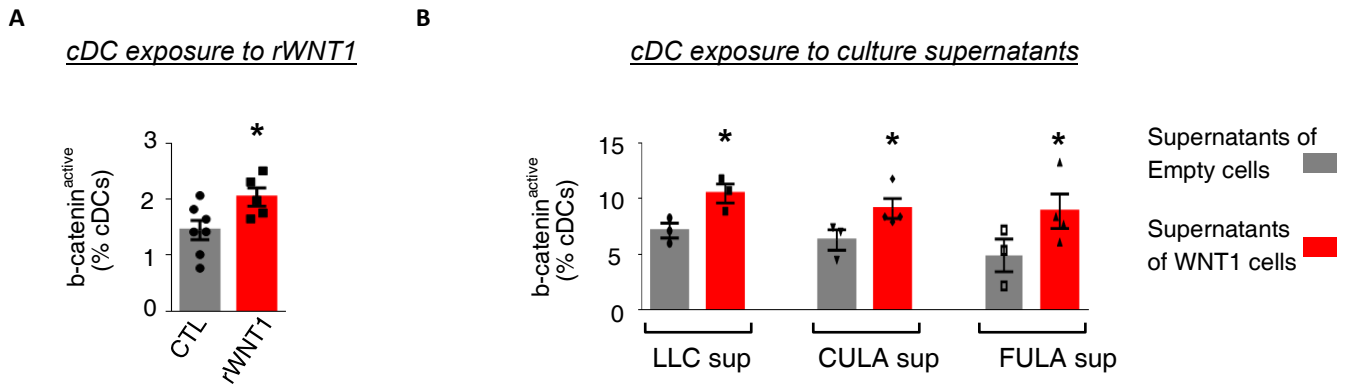

**Figure S10. B-catenin activation induced by paracrine WNT1 signaling in vitro.** cDCs were sorted from spleens of healthy mice and exposed to: A, 100ng/ml rWNT1 or B, culture supernatants from WNT1 overexpressing versus control (Empty) cancer cells. The following cell lines were transduced with WNT1 overexpressing or Empty viral vectors and used to obtain culture supernatants: LLC cells, C57BL/6-derived urethane-induced lung adenocarcinoma (CULA cells), and FVB-derived urethane-induced lung adenocarcinoma (FULA cells) (Agalioti et al., 2017, Nat Commun 8, 1505). Graphs depict cDCs with active b-catenin percent total cDCs assessed by FACS. Results are representative of 5 independent experiments. Biological replicates are shown. Error bars represent mean with SEM. \* $p < 0.05$  with t-test (B). Source data are provided as a Source Data file.

## Supplementary Figure 11

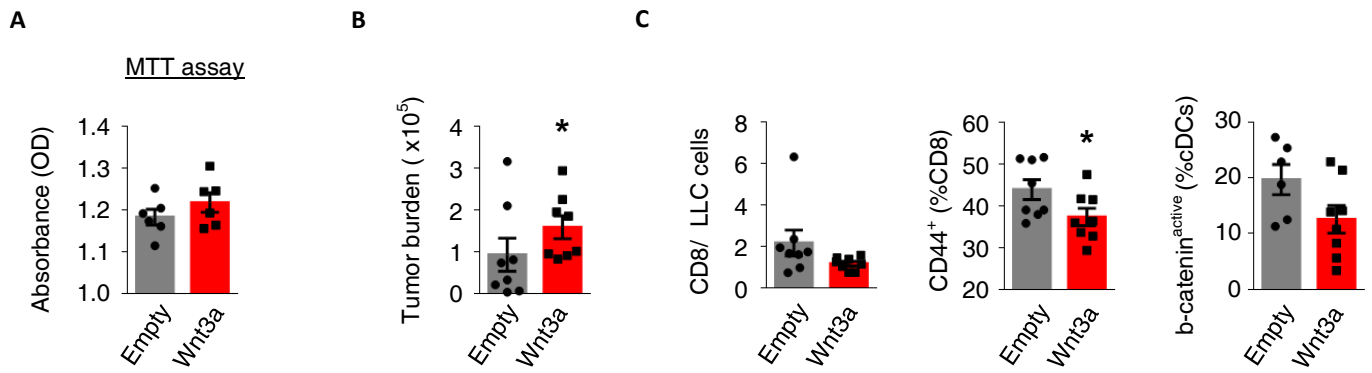

**Figure S11. Growth of Wnt3a-overexpressing LLC cells.** LLC cells were transduced with Wnt3a (Wnt3a) or Empty (Empty) viral vectors. A, In vitro proliferation (MTT assay). B, Tumor burden (total absolute number of LLC cells) 14 days after intrapulmonary implantation in syngeneic mice. C, Numbers of intratumoral CD8<sup>+</sup> T cells per cancer cell, T cell CD44 expression and b-catenin activation in cDCs. Error bars represent mean with SEM. Data are representative of two independent experiments with 5-8 mice per group. \*p < 0.05 with Mann Whitney U. Source data are provided as a Source Data file.

Supplementary Figure 12

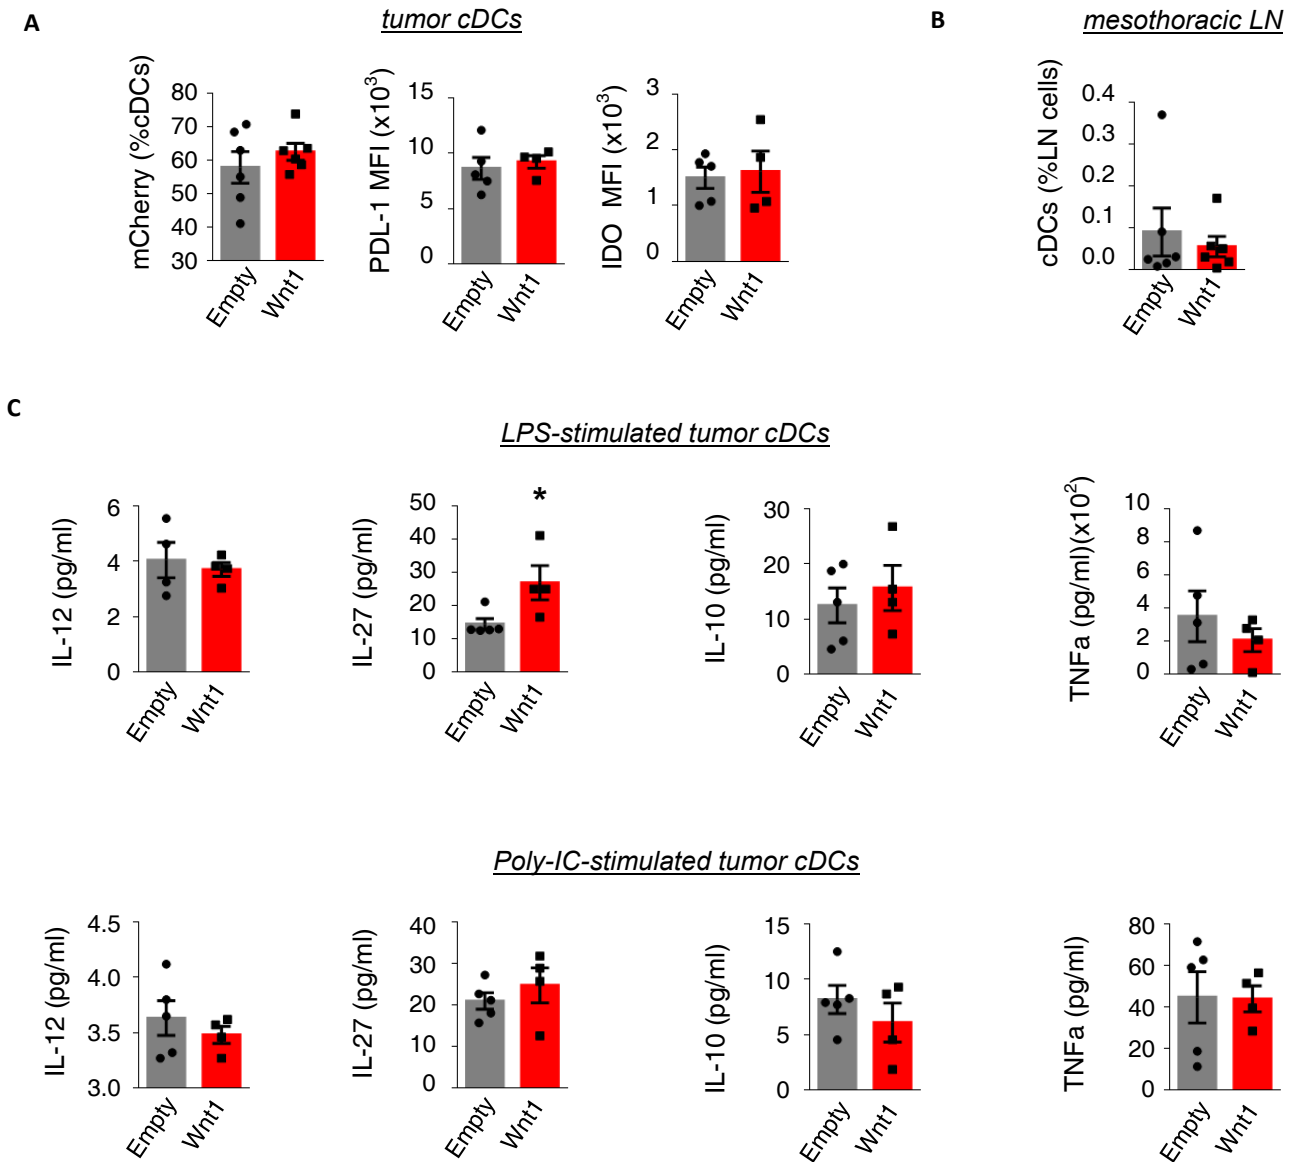

**Figure S12. Phenotypic and functional characterization of intratumoral lung cDCs.** Wnt1-overexpressing mCherry-LLC (Wnt1) versus control (Empty) cells were implanted intrapulmonary in syngeneic mice. On day 14 lung tumors and mesothoracic lymph nodes (LN) were obtained, mechanically dispersed and filtered. cDCs were FACS gated/sorted as  $SS^{low}Lin^{-}Ly6C^{+}MHCII^{+}CD11c^{high}$ . **A**, Tumor antigen capture capacity of intratumoral cDCs assessed by mCherry staining (Left). Expression of the inhibitory molecule PDL-1 (Middle) and of the immunosuppressive enzyme indoleamine (IDO) (Right). **B**, Numbers of LN cDCs. **C**, FACS sorted intratumoral cDCs were cultured for 48h in the presence of TLR ligands (LPS 1ug/ml or poly/IC 25ug/ml). Cytokine release in culture supernatants was measured by FACS using the bead-based “LEGENDplex multi-analytic assay”. **A-C**, Mean $\pm$ SEM are shown. **A, B**, Data are representative of two independent experiments with n=4-6 mice per group. **C**, Data are cumulative (biological replicates) of one experiment (n=5 mice per group). \*p<0.05, with Mann Whitney U. Source data are provided as a Source Data file.

### Supplementary Figure 13

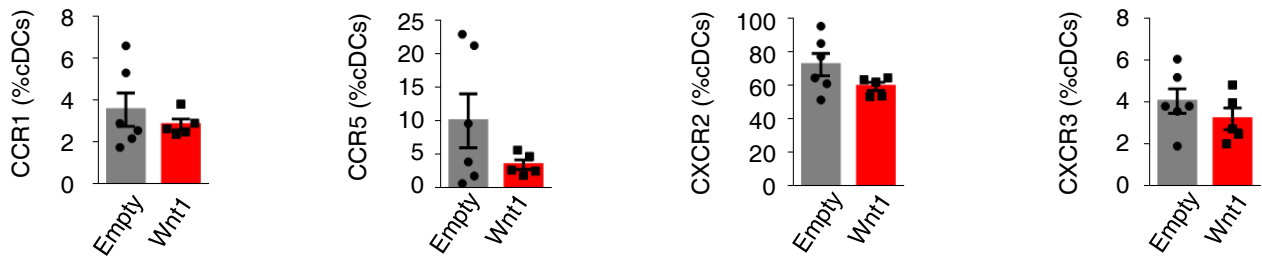

**Figure S13. Chemokine receptor expression by intratumoral cDCs.** Wnt1-overexpressing (Wnt1) versus control (Empty) LLC cells were implanted intrapulmonary in syngeneic mice. On day 14 lung tumors were excised and dispersed. Chemokine receptor expression was analyzed by FACS. cDCs were gated as shown in Fig. S7. Graphs depict chemokine receptor positive cDCs percent total cDCs. Mean $\pm$ SEM are shown. Data are two independent experiments with n=4-6 mice per group. Source data are provided as a Source Data file.

Supplementary Figure 14

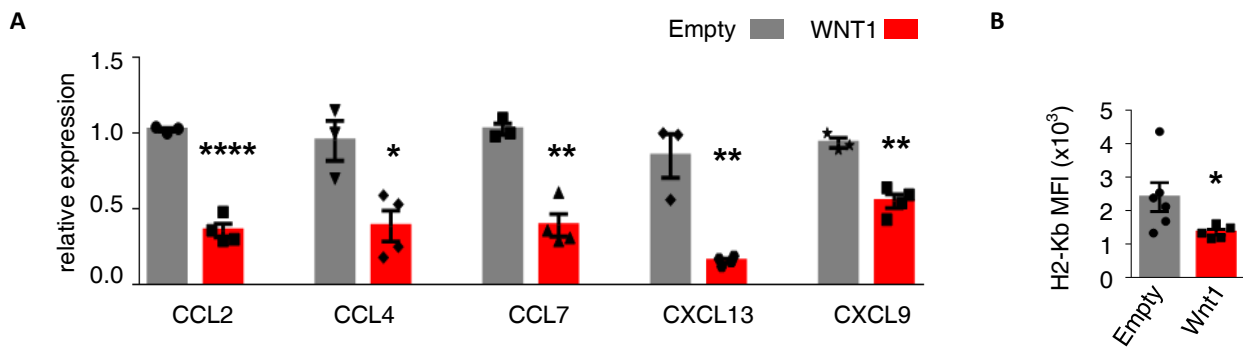

**Figure S14. Validation of RNAseq dataset analysis.** Reduced chemokine gene expression and H2-Kb expression in cDCs of WNT1 overexpressing (WNT1) versus control (Empty) lung LLC tumors was validated in distinct cohorts of mice. A, qPCR analysis of chemokine gene expression in sorted pooled cDCs (n=3 mice per group). Graphs depict expression relative to B2M. B, FACS analysis of H2-Kb in intratumoral cDCs. Graph depicts positive cDCs percent total cDCs. Dots indicate biological replicates. Mean±SEM are shown. Data are representative of two independent experiments. \*p<0.05, \*\*p<0.01, \*\*\*\*p<0.0001 with t-test. Source data are provided as a Source Data file.

## Supplementary Figure 15

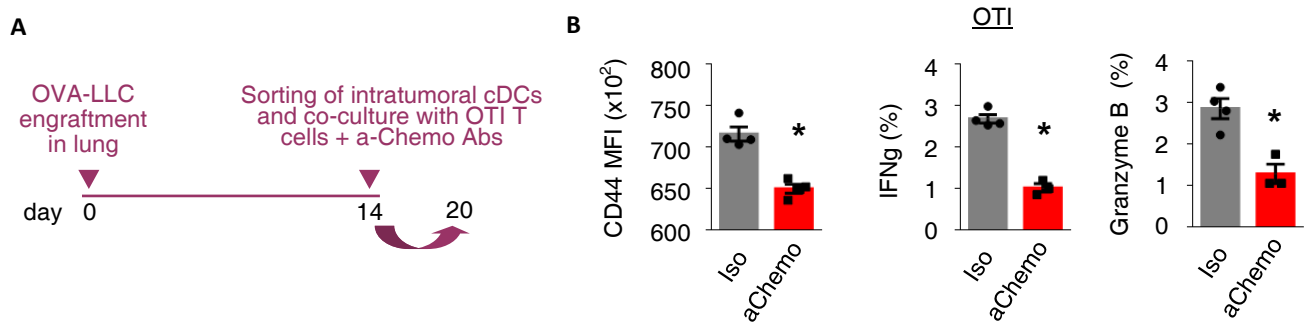

**Figure S15. Chemokine blockade in vitro constrains intratumoral cDC-induced T cell priming.** cDCs were FACS sorted from lung OVA-LLC tumors and co-cultured with naïve OTI T cells. A, Schematic representation of experimental design. B, T cell activation was assessed by CD44, IFNg and Granzyme B expression by FACS. Dots indicate biological replicates. Mean $\pm$ SEM are shown. Data are representative of two independent experiments, n=3-4 mice per group. \*p<0.05 with Mann Whitney U. Source data are provided as a Source Data file.



Supplementary Figure 16

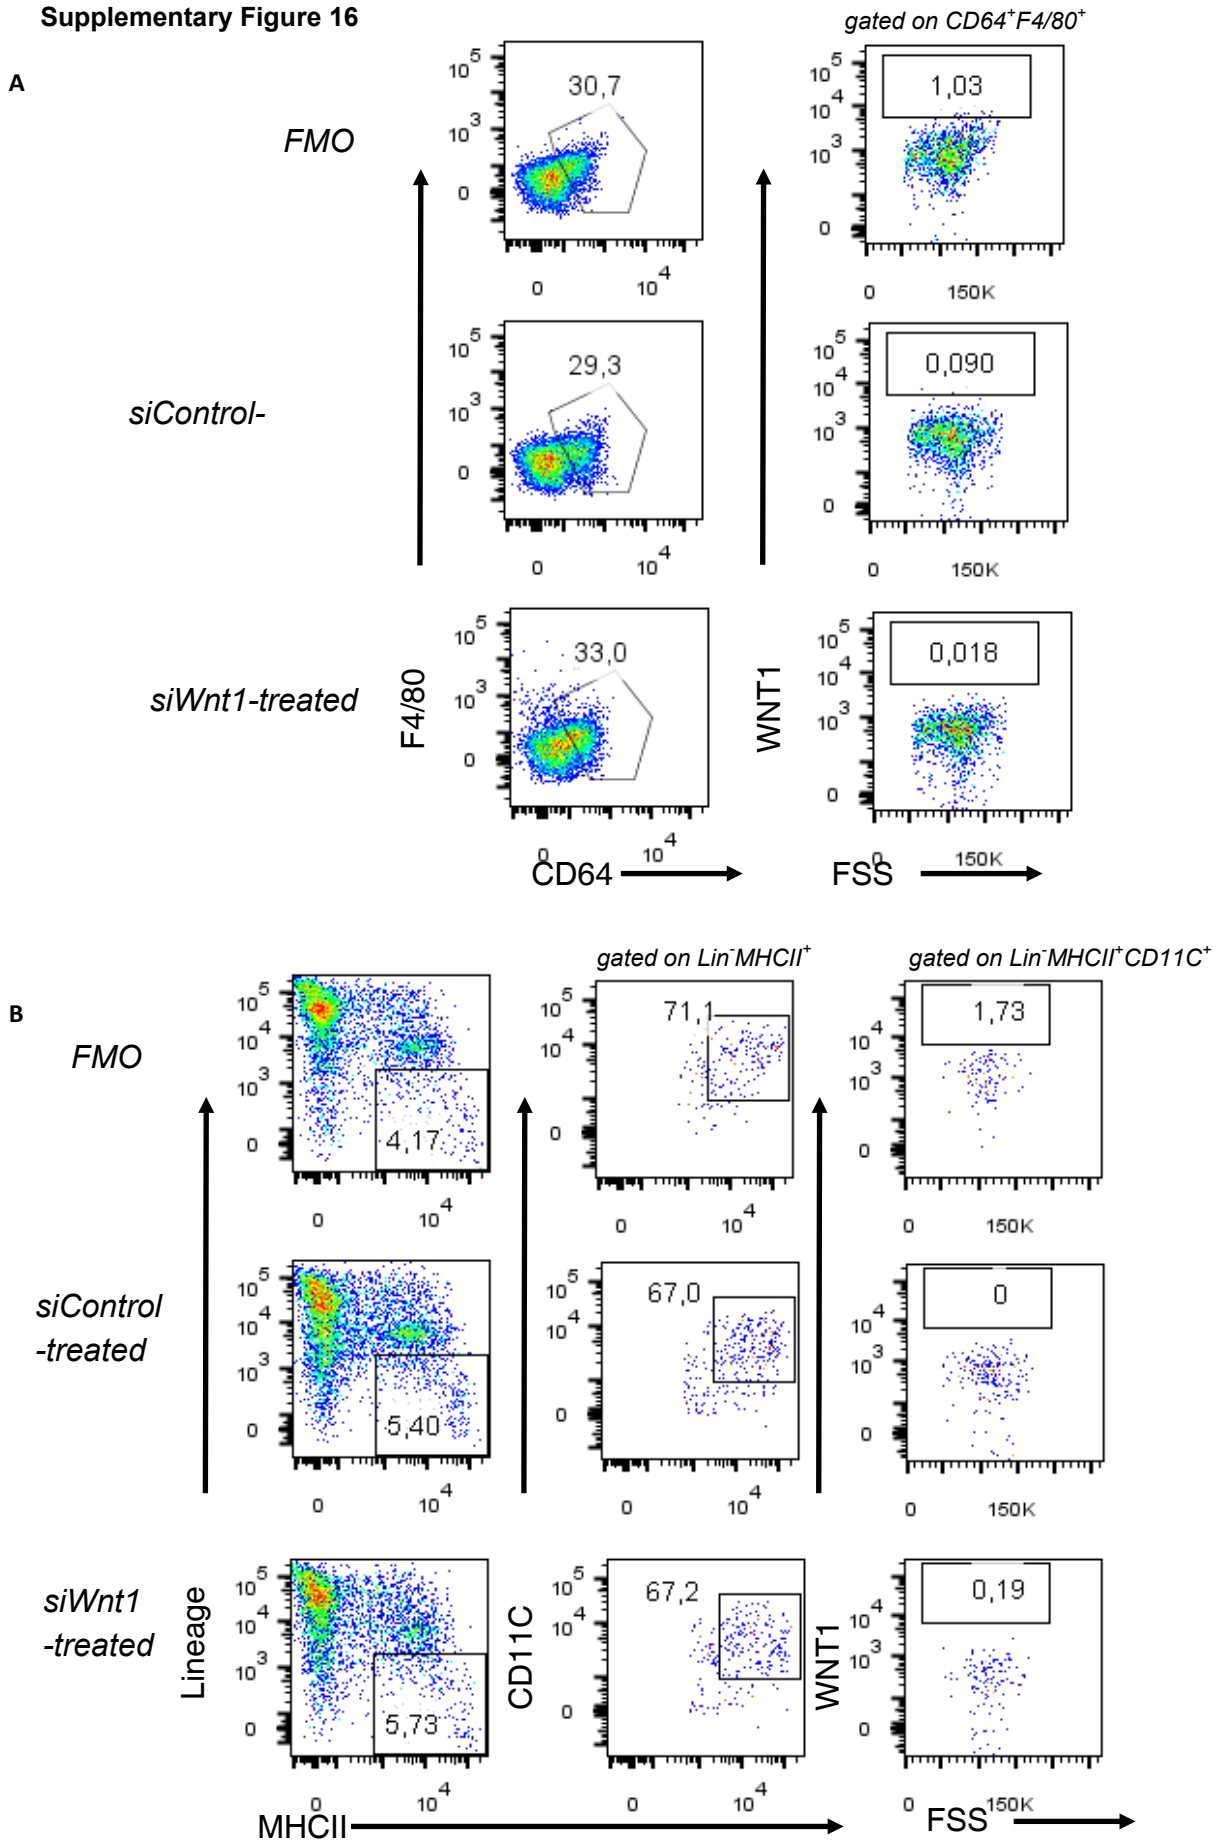

**Figure S16. Wnt1 expression in intratumoral macrophages and cDCs.** LLC lung tumors from siWnt1 versus siControl treated mice were lysed and Wnt1 expression was measured by intracellular staining in A, F4/80<sup>+</sup>CD64<sup>+</sup> macrophages, B, CD11c<sup>+</sup>MHCII<sup>+</sup> cDCs. Lineage cocktail consisted of Mabs: CD3, CD19, NK1.1, Ly6C, Ly6G, SiglecF, SiglecH. FMO (Fluorescent Minus One) was obtained by omitting anti-Wnt1 primary antibody, but labeling with fluorescent secondary antibody.

## Supplementary Figure 17

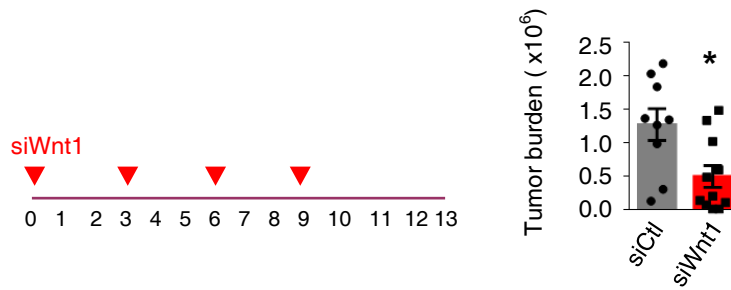

**Figure S17. siWnt1 loaded nanoparticles halt growth of LLC cells in vivo.** LLC cells were implanted intrapulmonary in syngeneic mice. Mice were treated with siWnt1 loaded or control nanoparticles i.p. as depicted (Left). Tumor burden (total absolute number of LLC cells) was assessed on day 13 by FACS analysis (Right). Graph depicts absolute number of tumor and mesothoracic lymph node LLC cells. Dots indicate biological replicates. Mean  $\pm$  SEM are shown. Data are representative of two independent experiments, n=9-10 mice per group. \* $p$ <0.05 with Mann Whitney U. Source data are provided as a Source Data file.

Supplementary Figure 18

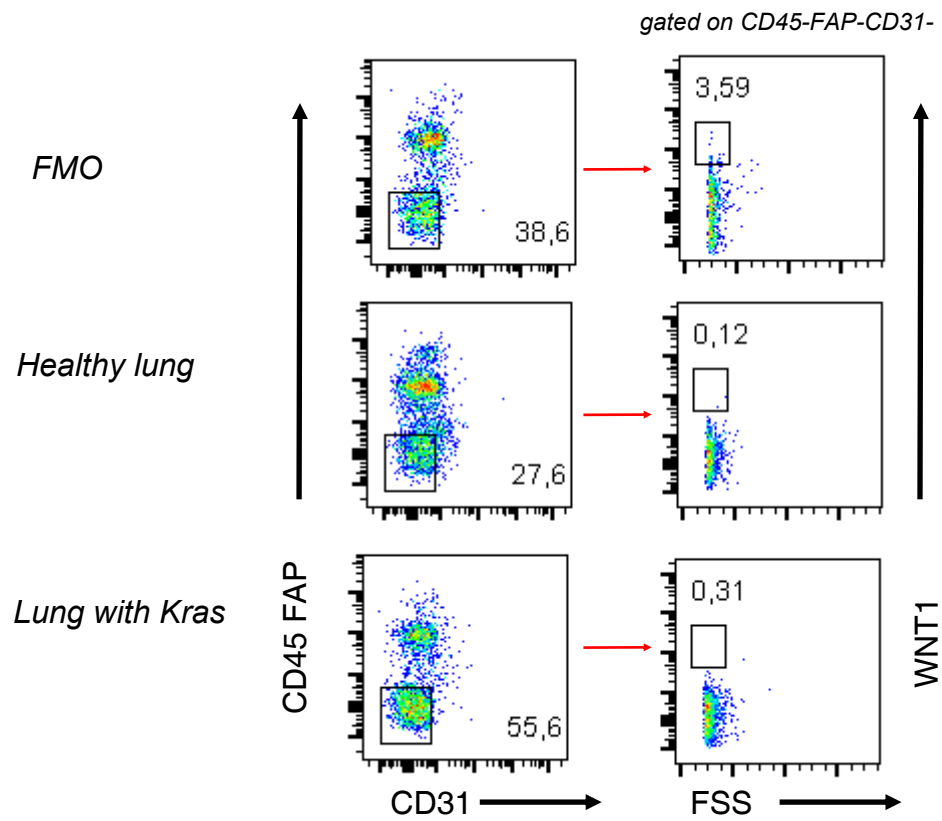

**Figure S18. Wnt1 expression in KRAS driven lung tumors.** Healthy and tumor bearing lungs from  $Kras^{LSL-G12D}$  mice were lysed and Wnt1 expression measured by intracellular staining in live CD45<sup>+</sup>FAP<sup>+</sup>CD31<sup>-</sup> cells. FMO (Fluorescent Minus One) was obtained by omitting anti-Wnt1 primary antibody, but labeling with fluorescent secondary antibody..

Supplementary Figure 19

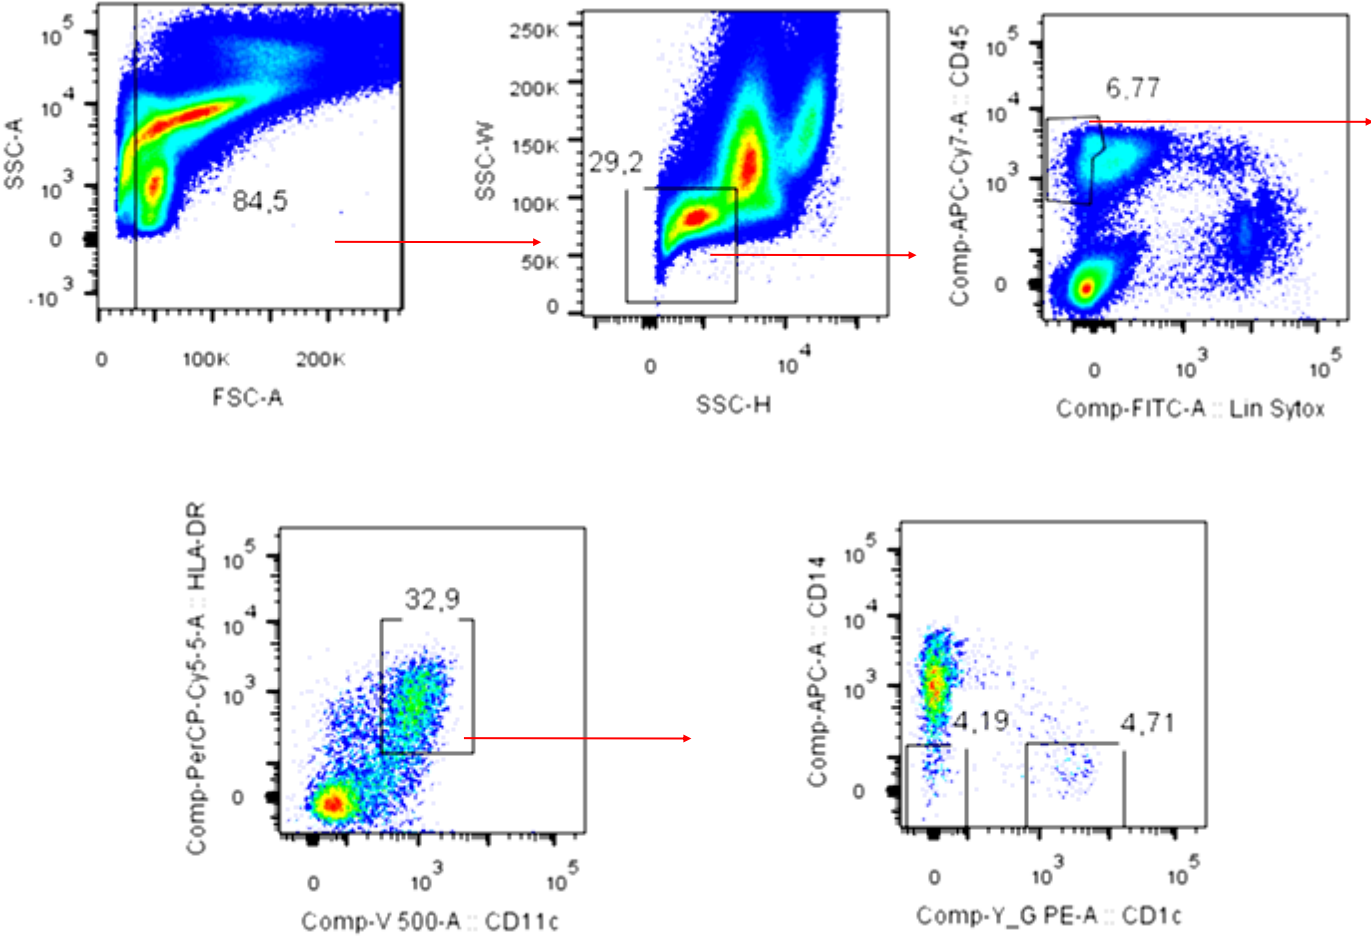

**Figure S19. Gating strategy for FACS analysis and sorting of human lung cDCs.** Human lung cDCs were FACS gated as CD45<sup>+</sup>Lin<sup>-</sup>CD14<sup>-</sup>HLA-DR<sup>+</sup>CD11c<sup>+</sup>. Lineage cocktail consisted of Mabs against CD3 (T cells), CD19 (B cells), CD56 (NK cells). CD14 was used to exclude monocytes, macrophages and inflammatory DCs.

Supplementary Figure 20

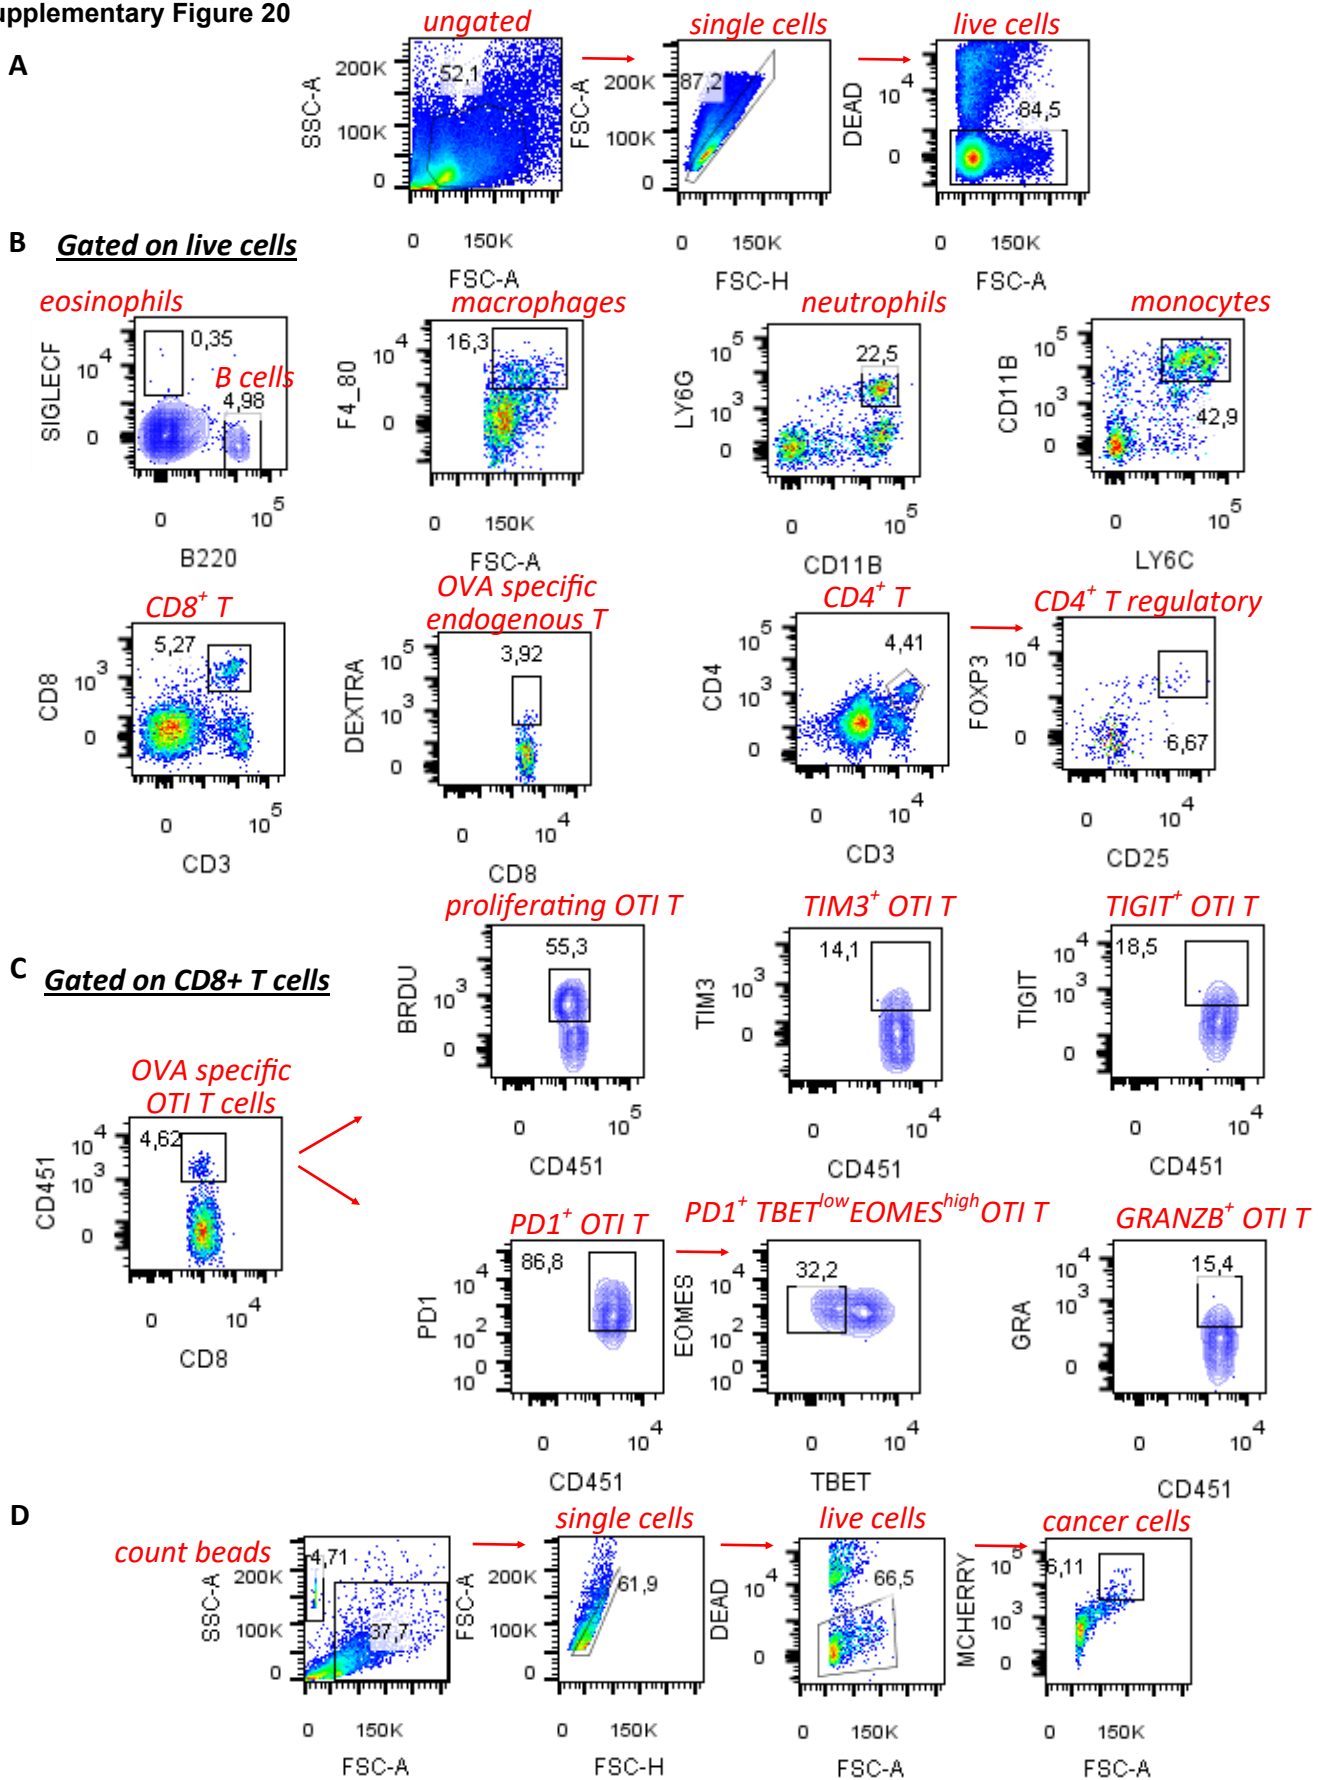

**Figure S20. Gating strategies used for cell identification and characterization.** (A) Gating strategy for live single cells used for all FACS analysis (Figs 2-7). (B) Gating strategy to identify eosinophils (SiglecF<sup>+</sup>), B cells (B220<sup>+</sup>), macrophages (FS<sup>high</sup>F4/80<sup>+</sup>), neutrophils (Ly6G<sup>+</sup>CD11b<sup>+</sup>), monocytes (CD11b<sup>+</sup>Ly6C<sup>+</sup>), CD8 T cells (CD8<sup>+</sup>CD3<sup>+</sup>), OVA specific endogenous T cells (CD8<sup>+</sup>DEXTRA<sup>+</sup>), CD4 T cells (CD4<sup>+</sup>CD3<sup>+</sup>), CD4 regulatory T cells (CD3<sup>+</sup>CD4<sup>+</sup>CD25<sup>+</sup>Fopx3<sup>+</sup>) from murine LLC lung tumors presented on Fig 2. (C) Gating strategy to analyze adoptively transferred OTI-T cells (CD8<sup>+</sup>CD45.1<sup>+</sup>) from murine LLC lung tumors presented on Fig 3. (D) Gating strategy to quantify tumor burden, based on enumeration of count beads and LLC cells (FS<sup>high</sup>mCherry<sup>+</sup>) from murine LLC lung tumors presented on Figs 2, 3, 4, 6. All gating strategies are shown for murine lung tu-

Supplementary Ta-

Information on archived FFPE tumor donors.

| Patient No | Age | Smoking History | pTNM        | Stage |
|------------|-----|-----------------|-------------|-------|
| 1          | 61  | 75              | T3N1M0      | IIIA  |
| 2          | 77  | 50              | T1aN0M0     | IA    |
| 3          | 63  | 90              | T2N0M0      | IB    |
| 4          | 57  | 70              | T2N2M0      | IIIA  |
| 5          | 75  | 150             | T2aN2M0     | IIIA  |
| 6          | 64  | 150             | T1N0M0      | IA    |
| 7          | 63  | 60              | T3N2M0      | IIIA  |
| 8          | 61  | 80              | T1aN0M0     | IA    |
| 9          | 76  | 60              | T3N0M0      | IIB   |
| 10         | 70  | 60              | T2aN0M0     | IB    |
| 11         | 65  | 115             | T2N0M0      | IB    |
| 12         | 61  | 40              | T1bN0M0     | IA    |
| 13         | 66  | 60              | T3N2M0      | IIIA  |
| 14         | 61  | 40              | T1N0M0      | IA    |
| 15         | 70  | 100             | T3N2M0      | IIIA  |
| 16         | 66  | 60              | T2N1M0      | IIB   |
| 17         | 72  | 200             | T2aN0M0     | IB    |
| 18         | 41  | 60              | T1N0M0      | IA    |
| 19         | 61  | 70              | T2bN1M0     | IIB   |
| 20         | 64  | 60              | T1N0M0      | IA    |
| 21         | 45  | 75              | T3N0M0      | IIB   |
| 22         | 59  | 80              | T2aN0M0     | IB    |
| 23         | 69  | 120             | T2N0M0      | IB    |
| 24         | 69  | 120             | T2N0M0      | IB    |
| 25         | 69  | 40              | T2bN1M0     | IIB   |
| 26         | 74  | 75              | T3N0M0      | IIB   |
| 27         | 66  | 60              | T2bN2<br>M0 | IIIA  |
| 28         | 82  | 110             | T3N2M0      | IIIA  |
| 29         | 64  | 102             | T2aN0M0     | IA    |
| 30         | 68  | 80              | T2bN1M0     | IIB   |
| 31         | 73  | 0               | T2aN1M0     | IIA   |
| 32         | 63  | 113             | T2N0M0      | IB    |
| 33         | 54  | 90              | T1N2M0      | IIIA  |
| 34         | 71  | 80              | T3N0M0      | IIB   |

**Table S1. Patient information.** Information for consented Lung Adenocarcinoma patients who had undergone surgical resectioning as part of their treatment plan and whose paraffin-embedded tumor specimens were retrieved retrospectively and analyzed by immunohistochemistry and qPCR.

**Supplementary Table 2**

**Information on fresh tumor and healthy juxtatumor donors.**

| Patient No | Age | Smoking History | pTNM    | Stage |
|------------|-----|-----------------|---------|-------|
| 1          | 81  | 60              | T1aN1M0 | IIA   |
| 2          | 51  | 50              | T2aN0M0 | IB    |
| 3          | 52  | 35              | T2aN2M0 | IIIA  |
| 4          | 62  | 80              | T2aN0M0 | IB    |
| 5          | 59  | 40              | T2bN1M0 | IIB   |
| 6          | 66  | 60              | T1bN0M0 | IA    |
| 7          | 71  | 50              | T2aN0M0 | IB    |
| 8          | 73  | 90              | T3N0M0  | IIB   |

**Table S2. Patient information.** Information for consented Lung Adenocarcinoma patients who underwent surgical resectioning as part of their treatment plan and whose paired tumor/juxtatumor specimens were obtained immediately after surgery (prospectively), mechanically dispersed, cultured and/or analyzed by FACS.

### Supplementary Table 3

| Wnt-target Gene List                                                                                                                                                                                                                                                                                                                                                                                                                                                                                                                                                                                                                                                                                                                                                                                                                                                  |
|-----------------------------------------------------------------------------------------------------------------------------------------------------------------------------------------------------------------------------------------------------------------------------------------------------------------------------------------------------------------------------------------------------------------------------------------------------------------------------------------------------------------------------------------------------------------------------------------------------------------------------------------------------------------------------------------------------------------------------------------------------------------------------------------------------------------------------------------------------------------------|
| MYC, MYCN, CCND1, TCF7, LEF1, PPARD, JUN, FOSL1, PLAUR, MMP7, AXIN2, NRCAM, TCF4, CCKBR, CD44, EPHB2, BMP4, CLDN7, BIRC5, VEGFA, VEGFB, FGF18, ATOH1, MET, EDN1, MYCBP, L1CAM, ID2, JAG1, MSL1, TIAM1, NOS2, TERT, DKK1, FGF9, LBH, FGF20, LGR5, SOX9, SOX17, RUNX2, GREM1, SALL4, TNFSF11, TNFRSF11B, CYR61, SOX2, PTTG1, DLK1, FOXN1, MMP26, NANOG, POU5F1, SNAI1, FN1, FZD7, FST, WNT3A, ISL1, MMP2, MMP9, MYOD1, EN2, GJA1, GJB6, RARG, MITF, STRA6, RHOU, TNFRSF9, EFNB1, STRA6, NPP2, ISLR, TWIST1, MMP3, TBX1, TBX3, GCG, BGLAP, CDX1, PTGS2, IRX3, SIX3, SP5, NEUROD1, NKX2-2, GBX2, CACNA1G, WISP1, WISP2, IGF2, IGF1, VEGFC, ABCB1, COX2, IL6, POSTN, CDX1, CDX4, BTRC, SFRP2, PITX2, EGF, EDAR, CDH1, KRT, OVOL1, CDKN2A, CTLA4, KLF5, FGF4, CXCL8, RET, VCAN, TNFRSF19, EN2, EN1, FZD2, NLK, BIRC7, MKI67, WNT2, FZD8, CD24, EPCAM, IL27, ALDH1A1, ALDH12 |

**Table S3. Wnt-target Gene List.** The Wnt-target GeneList consists of Wnt-target genes listed on The Wnt Homepage of Stanford University (<http://web.stanford.edu/group/nusselab/cgi-bin/wnt/>), complemented by genes that were retrieved from the literature (J Natl Cancer Inst. 2014; 106(1), Am J Cancer Res 2015;5(3):1032-1046, Oncoimmunology. 2015 Dec; 4(12): e1052932 , Discov Med. 2015; 19(105): 303–310).



Supplementary Table 4

## Reagents and Resources.

| REAGENT or RESOURCE                  | SOURCE                    | IDENTIFIER |
|--------------------------------------|---------------------------|------------|
| Antibodies                           |                           |            |
| Anti-mouse CD44                      | BD Biosciences            | 553133     |
| Anti-mouse MHCII                     | BD Biosciences            | 562928     |
| Anti-mouse CD11b                     | BD Biosciences            | 557397     |
| Anti-mouse CD25                      | BD Biosciences            | 553866     |
| Anti-mouse Ly6C                      | BD Biosciences            | 553104     |
| Anti-Ki67                            | Thermo Fischer Scientific | MAS-14520  |
| Anti-Wnt1                            | Thermo Fischer Scientific | MA5-15544  |
| Anti-Mouse IgG (H+L) Alexa Fluor 700 | Thermo Fischer Scientific | A-21036    |
| Anti-mouse CXCL11                    | Thermo Fischer Scientific | PA5-47767  |
| Anti-mouse CXCL10                    | Thermo Fischer Scientific | MA5-23774  |
| Anti-mouse CXCL9                     | Thermo Fischer Scientific | PA5-47020  |
| Anti-mouse CCL3                      | Thermo Fischer Scientific | PA5-46951  |
| Anti-mouse CCL4                      | Thermo Fischer Scientific | MA5-23742  |
| H-2k(b) SIINFEKL                     | NIH                       | 35494      |
| Anti- mCherry                        | Invitrogen                | M11241     |
| Anti-mouse CD25                      | Biolegend                 | 102007     |
| Anti-mouse Foxp3                     | Biolegend                 | 126407     |
| Anti-mouse PD1                       | Biolegend                 | 109103     |
| Anti-mouse IFN $\gamma$              | Biolegend                 | 505807     |
| Anti-mouse CD45.1                    | Biolegend                 | 110723     |
| Anti-mouse TIGIT                     | Biolegend                 | 142103     |
| Anti-mouse TIM3                      | Biolegend                 | 119705     |
| Anti- BrdU                           | Biolegend                 | 339811     |
| Anti-mouse PDL-1                     | Biolegend                 | 124313     |
| Anti-mouse CD62L                     | Biolegend                 | 1004417    |
| Anti-mouse CD3                       | Biolegend                 | 100236     |
| Anti-mouse CD19                      | Biolegend                 | 115511     |
| Anti-mouse Ly6C                      | Biolegend                 | 128005     |
| Anti-mouse Ly6G                      | Biolegend                 | 127613     |
| Anti-mouse F4/80                     | Biolegend                 | 123115     |
| Anti-mouse SiglecF                   | Biolegend                 | 562680     |
| Anti-mouse SiglecH                   | Biolegend                 | 129611     |
| Anti-mouse NK1.1                     | Biolegend                 | 108719     |
| Anti-mouse MHCII                     | Biolegend                 | 107627     |
| Anti-mouse CD11c                     | Biolegend                 | 117317     |

|                                    |                         |            |
|------------------------------------|-------------------------|------------|
| Anti-mouse CD16/32                 | Biolegend               | 101302     |
| Anti-mouse B220                    | Biolegend               | 103225     |
| Anti-mouse CD172a (SIRP $\alpha$ ) | Biolegend               | 144021     |
| Anti-mouse CD26 (DPP-4)            | Biolegend               | 137803     |
| Anti-mouse CD24                    | Biolegend               | 101823     |
| Anti-mouse/human CD45R/B220        | Biolegend               | 103229     |
| Anti-mouse/human CD11b             | Biolegend               | 101245     |
| Anti-mouse/rat XCR1                | Biolegend               | 148220     |
| Anti-mouse CD64                    | Biolegend               | 139311     |
| Anti-mouse CD64                    | Biolegend               | 139315     |
| Anti-mouse F4/80                   | Biolegend               | 123141     |
| Anti-mouse CD195 (CCR5)            | Biolegend               | 107015     |
| Anti-mouse CD182 (CXCR2)           | Biolegend               | 149315     |
| Anti-mouse CD183 (CXCR3)           | Biolegend               | 126531     |
| Anti-mouse CD191 (CCR1)            | Biolegend               | 152505     |
| Anti-mouse H-2Kb                   | Biolegend               | 116519     |
| Anti-rabbit IgG PE                 | Biolegend               | 406421     |
| Anti-human CD45                    | Biolegend               | 304014     |
| Anti-human CD8                     | Biolegend               | 301031     |
| Anti-human CD107                   | Biolegend               | 328619     |
| Anti-human CD3                     | Biolegend               | 317305     |
| Anti-human CD19                    | Biolegend               | 302205     |
| Anti-human CD56                    | Biolegend               | 318303     |
| Anti-human CD11c                   | Biolegend               | 301633     |
| Anti-human HLA-DR                  | Biolegend               | 307629     |
| Anti-human CD14                    | Biolegend               | 301807     |
| Anti-mouse F4/80                   | eBiosciences            | 12-4801-82 |
| Anti-mouse CD3                     | eBiosciences            | 25-0031-81 |
| Anti-mouse CD4                     | eBiosciences            | 53-0041-82 |
| Anti-mouse Tbet                    | eBiosciences            | 12-5825-80 |
| Anti-mouse EOMES                   | eBiosciences            | 50-4875-80 |
| Anti-mouse phospho-S6              | eBiosciences            | 17-9007-41 |
| Anti-mouse phospho-AKT             | eBiosciences            | 17-9715-41 |
| Anti-mouse GranzymeB               | eBiosciences            | 12-8898-80 |
| Anti-mouse IDO                     | eBiosciences            | 46-9473-80 |
| Anti-human CD1                     | eBiosciences            | 25-0015-41 |
| Anti-Wnt1                          | Abcam                   | ab15251    |
| Anti-Wnt3a                         | Abcam                   | ab19925    |
| Anti-Actin                         | Santa Cruz              | sc-1615    |
| Bacterial and Virus Strains        |                         |            |
| DH5a competent cells               | In house                | N/A        |
| Retroviruses                       | This paper              | N/A        |
| Lentiviruses                       | This paper              | N/A        |
| Adenoviruses                       | Vector Development Lab, | N/A        |

|                                                       |                                |             |
|-------------------------------------------------------|--------------------------------|-------------|
| Biological Samples                                    |                                |             |
| Human lung cancer sample and adja-                    | Department of Surgery, Sotiria | N/A         |
| Paraffin sections of human lung can-                  | Department of Pathology,       | N/A         |
| Chemicals, Peptides, Recombinant Proteins and Viruses |                                |             |
| Urethane                                              | Sigma                          | CAS 51-79-6 |
| Sytox Green Nucleic Acid Stain                        | Invitrogen                     | S7020       |
| BD Horizon™ Fixable Viability Stain                   | BD Biosciences                 | 564997      |
| Zombie NIR™ Fixable Viability Kit                     | Biolegend                      | 42315       |
| Zombie Green™ Fixable Viability Kit                   | Biolegend                      | 423111      |
| Propidium Iodide                                      | Sigma-Aldrich                  | 255535-16-4 |
| Mouse IL-2                                            | R&D Systems                    | 402-ML-100  |
| Mouse Wnt-1/sFRP-1                                    | R&D Systems                    | 9765-WN-010 |
| LPS e.coli                                            | Sigma-Aldrich                  | 011B4       |
| Poly I/C                                              | Amersham Biosciences           | 27-4732     |
| BrdU                                                  | Thermo Fischer Scientific      | B23151      |
| mWNT3a lentiviral particles                           | Gen Target Inc                 | LVP610      |
| Critical Commercial Assays                            |                                |             |
| Fluorescein di-β-D-galactopyranoside                  | Molecular Probes               | F1179       |
| Dynabeads Sheep anti-Rat                              | Invitrogen                     | 11035       |
| CD45 Microbeads mouse                                 | Miltenyi Biotech               | 130-052-301 |
| CD45 Microbeads human                                 | Miltenyi Biotech               | 130-045-801 |
| Deposited Data                                        |                                |             |
| Experimental Models: Cell Lines                       |                                |             |
| LL/2 (LLC1) Lewis Lung Carcinoma                      | ATCC                           | CRL-1642    |
| 2.43 hybridoma cell line                              | ATCC                           | TIB-210     |
| HEK lenti-X                                           | Fousteri Lab BSRC Al. Fleming  |             |
| AE17                                                  | Kalomenidis Lab University of  |             |
| CMT-93                                                | Kontoyiannis Lab BSRC Al.      |             |
| AB1                                                   | Kalomenidis Lab University of  |             |
| Colon 26                                              | Kalomenidis Lab University of  |             |

|                                                |                                       |                                                                              |
|------------------------------------------------|---------------------------------------|------------------------------------------------------------------------------|
| MC 38                                          | Kalomenidis Lab<br>University of Ath- |                                                                              |
| platinum-E                                     | Capetanaki Lab                        |                                                                              |
| CULA                                           | Stathopoulos Lab<br>University of Pa- |                                                                              |
| FULA                                           | Stathopoulos Lab<br>University of Pa- |                                                                              |
| <b>Experimental Models: Organisms/Strains</b>  |                                       |                                                                              |
| OT-I TCR transgenic mice                       | Andreakos Lab                         |                                                                              |
| B6.SJL-Ptprc <sup>a</sup> mice                 | Jackson Laborato-                     | 002014                                                                       |
| B6(Cg)-Zbtb46 <sup>tm1(HBEGF)Mnz</sup> /J mice | Jackson Laborato-                     | 019506                                                                       |
| B6N.129P2-Axin2 <sup>tm1Wbm</sup> /J           | Behrens Lab Uni-                      |                                                                              |
| B6.129S4-Kras <sup>tm4Tyj</sup> /J             | Jackson Laborato-                     | 008179                                                                       |
| <b>Oligonucleotides</b>                        |                                       |                                                                              |
| H_WNT1_1                                       | Sigma-Aldrich                         | <b>KSPQ12012</b>                                                             |
| H_WNT10A_1                                     | Sigma-Aldrich                         | <b>KSPQ12012</b>                                                             |
| H_WNT10B_1                                     | Sigma-Aldrich                         | <b>KSPQ12012</b>                                                             |
| H_WNT2_1                                       | Sigma-Aldrich                         | <b>KSPQ12012</b>                                                             |
| human U6 snRNA                                 | Invitrogen                            | <i>Fw</i> : 5'-CTCGCTTCGGCAGCACA-3'<br><i>Rv</i> : 5'- AACGCTTCACGAATTTGCGT- |
| M_CCL2_1                                       | Sigma-Aldrich                         | <b>KSPQ12012</b>                                                             |
| M_CCL4_1                                       | Sigma-Aldrich                         | <b>KSPQ12012</b>                                                             |
| M_CCL7_1                                       | Sigma-Aldrich                         | <b>KSPQ12012</b>                                                             |
| M_CCL4_1                                       | Sigma-Aldrich                         | <b>KSPQ12012</b>                                                             |
| M_CXCL3_1                                      | Sigma-Aldrich                         | <b>KSPQ12012</b>                                                             |
| M_CXCL9_1                                      | Sigma-Aldrich                         | <b>KSPQ12012</b>                                                             |
| Mouse B2M                                      | Invitrogen                            | <i>Fw</i> : 5'-TTCTGGTGCTTGTCTCACTGA<br>-3' <i>Rv</i> : 5'-                  |
| siWNT1 mouse                                   | Sigma-Aldrich                         | SASI_Mm01_00030630                                                           |
| siRNA Universal Negative Control #1            | Sigma-Aldrich                         |                                                                              |
| siWNT1 Human                                   | Sigma-Aldrich                         | SASI_Hs01_00223473                                                           |
| siRNA Fluorescent Universal Negative           | Sigma-Aldrich                         |                                                                              |

| Recombinant DNA       |                              |  |
|-----------------------|------------------------------|--|
| pMIGR1-OVA-IRES-eGFP  | Zehn Dietmar Swiss Vaccine   |  |
| pMSCV-IRES-mCherry FP | Vignali Dario University of  |  |
| pLNC-WNT1             | Jan Kitajewski Columbia Uni- |  |
